# Supplementary material for: A ratiometric fluorescent probe for fast detection and bioimaging of formaldehyde
Source: Royal Society of Chemistry journal article supplement (doi:10.1039/d2ob02314h), 2023-01-01
Supplement: d2ob02314h1.pdf [file d2ob02314h1.pdf]

# A Ratiometric Fluorescent Probe for Fast Detection and Bioimaging of Formaldehyde

Nai-Jie Lin, Huan Wu, Jing Peng, Shu-Han Yang, Rui Tan,\* Yu Peng,\* and Ya-Wen Wang\*

School of Life Science and Engineering, School of Chemistry,  
Southwest Jiaotong University,  
Chengdu 610031, People's Republic of China

tanruiswjt@sohu.com; pengyu@swjtu.edu.cn; ywwang@swjtu.edu.cn

## Table of Contents

|                                                                                                |     |
|------------------------------------------------------------------------------------------------|-----|
| 1. General information.....                                                                    | S2  |
| 2. Summary of FA fluorescent probes based on cyclization mechanism (Table S1). .....           | S4  |
| 3. Synthesis of <b>SWJT-10</b> (Scheme S1).....                                                | S5  |
| 4. <sup>1</sup> H, <sup>13</sup> C NMR spectra and ESI-MS of <b>SWJT-10</b> (Figs. S1-S3)..... | S6  |
| 5. Screening conditions for the detection of FA by <b>SWJT-10</b> (Figs. S4-S6) .....          | S8  |
| 6. The stability of <b>SWJT-10</b> and <b>SWJT-10</b> +FA (Figs. S7) .....                     | S11 |
| 7. The detection limit of <b>SWJT-10</b> to FA (Figs. S8) .....                                | S12 |
| 8. Selectivity and anti-interference studies (Figs. S9) .....                                  | S13 |
| 9. <sup>1</sup> H NMR titration spectrum of <b>SWJT-10</b> with FA(Figs. S10) .....            | S14 |
| 10. ESI-MS spectra of Compound 4 (Figs. S11) .....                                             | S15 |
| 11. Cell viability of <b>SWJT-10</b> (Figs. S12) .....                                         | S16 |

## 1. General information.

### 1.1 Chemical reagents

Malononitrile, isophorone, *p*-hydroxybenzaldehyde, trifluoroacetic acid (TFA), *n*-butylamine, formaldehyde (37% wt, in water) and other reagents were purchased from Innochem Technology Co., Ltd. All other routine reagents used in the experiments were analytical reagents.

### 1.2 Instruments

<sup>1</sup>H and <sup>13</sup>C NMR spectra of **SWJT-10** were taken on a Bruker AVANCE OEO 400 spectrometer with TMS as internal standard and DMSO-*d*<sub>6</sub> as solvent. ESI-MS spectra of **SWJT-10** and compound 4 were recorded by using Bruker MicrO TOF spectrometer. The fluorescence spectra were obtained by Hitachi F-7000 spectrofluorometer with the slit widths at 10/10 nm. The absorption spectra were obtained by AOE A360 UV-Vis spectrophotometer. Confocal imaging of HeLa cells was performed by Nikon AR1+ confocal microscope. Zebrafish larvae images were obtained by Olympus BX61W1-FV1000 confocal scanning microscope.

### 1.3 Analysis experiments

**SWJT-10** was weighed and dissolved in DMSO to prepare 1.0 mM stock solution. Formaldehyde, Acetaldehyde, Glyoxal, Methylglyoxal, Acrolein, Pyruvate, H<sub>2</sub>O<sub>2</sub>, ClO<sup>-</sup> were taken in volume and diluted with distilled water to prepare 100.0 mM stock solutions. Cys, Hcy, GSH, glucose were weighed and dissolved in distilled water to prepare 100.0 mM stock solutions. Dilute 20.0 μL of **SWJT-10** stock solution to 1980 μL with DMSO/PBS, then add 20.0 μL of assay stock solution (2.0 mL final volume, DMSO/PBS, v/v, 1:1), and incubate the mixture at room temperature 15 minutes. For all fluorescence spectra, excitation was set to 435 nm and the excitation and emission gap was 10/10 nm.

The quantum yield was calculated by the following formula:

$$\Phi_u = \Phi_s (F_u/F_s)(A_s/A_u)$$

"F<sub>u</sub>" and "A<sub>u</sub>" represent the fluorescence emission peak integral value and absorbance value of **SWJT-10**, respectively. "F<sub>s</sub>" and "A<sub>s</sub>" were the fluorescence

emission peak integral value and absorbance value of Rhodamine B, respectively. " $\Phi_u$ " and " $\Phi_s$ " represent the fluorescence quantum yields of **SWJT-10** and Rhodamine B, respectively.

#### **1.4 Biological experiments**

This study was approved by the Southwest Military Region General Hospital and Southwest Jiaotong University Animal Experiment Ethics Committee. The cytotoxicity of **SWJT-10** to HeLa cells was examined by CCK-8 assay method. HeLa cells were seeded at a 96-well culture plate. After growth at 37 °C in a 5% CO<sub>2</sub> for 24 h, treated with 0, 5.0, 10.0, 15.0, 20.0  $\mu$ M **SWJT-10**. After incubation for 12 h, the CCK solution was added into each well for further incubation for 4 h. The absorbance at 540 nm was measured.

HeLa cells were incubated with 10.0  $\mu$ M **SWJT-10** at 37°C, 5% CO<sub>2</sub> for 30 mins, and then washed three times with PBS to remove extracellular excess probe. Next, adding 1.0 mM FA to the experimental group, then incubate for another 30 mins, and imaging after washing three times. Fluorescence imaging was performed on a Nikon AR1+ confocal microscope. The excitation wavelength is 435 nm, the fluorescence at 575-625 nm is collected in the yellow channel, and the fluorescence at 655-705 nm is collected in the red channel.

The zebrafish larvae were incubated with 10.0  $\mu$ M **SWJT-10** in distilled water for 30 mins and then washed with distilled water. Next, 1.0 mM FA was added to the experimental group and incubated for another 30 mins. After that, zebrafish larvae were washed with distilled water three times. Finally, zebrafish larvae were immobilized with 1.5% agarose for confocal imaging using an Olympus BX61W1-FV1000 Confocal Scanning Microscope.

## 2. Summary of FA fluorescent probes based on cyclization mechanism.

**Table S1**

| Name           | Probes structure                                                                    | $\lambda_{\text{ex}}/\lambda_{\text{em}}$<br>(nm) | Linear<br>range        | Detection<br>limit   | Response<br>time | Referen-<br>ces  |
|----------------|-------------------------------------------------------------------------------------|---------------------------------------------------|------------------------|----------------------|------------------|------------------|
| dRB-EDA        | 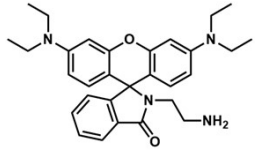   | 560/590                                           | -                      | -                    | 1 h              | Ref. 26          |
| R6-FA          |    | 530/560                                           | 2-10<br>$\mu\text{M}$  | 0.77 $\mu\text{M}$   | 10 s             | Ref. 27          |
| L              |    | 520/620                                           | 0-3<br>mM              | 8.3 $\mu\text{M}$    | 5 min            | Ref. 28          |
| DAN            |  | 335/424                                           | 0-80<br>$\mu\text{M}$  | 0.95 $\mu\text{M}$   | 5 min            | Ref. 29          |
| Np2            |  | 380/444                                           | 0-250<br>$\mu\text{M}$ | 1.8 $\mu\text{M}$    | 2 h              | Ref. 30          |
| NP-lyso        |  | 380/444                                           | 0-200<br>$\mu\text{M}$ | 0.27 $\mu\text{M}$ . | 1 h              | Ref. 31          |
| DAS            |  | 345/490                                           | 0-100<br>$\mu\text{M}$ | 1 $\mu\text{M}$      | 40 min           | Ref. 32          |
| <b>SWJT-10</b> |  | 435/600,<br>680                                   | 0-1<br>mM              | 4.5 $\mu\text{M}$    | 5 s              | <i>This work</i> |

### 3. Synthesis of SWJT-10.

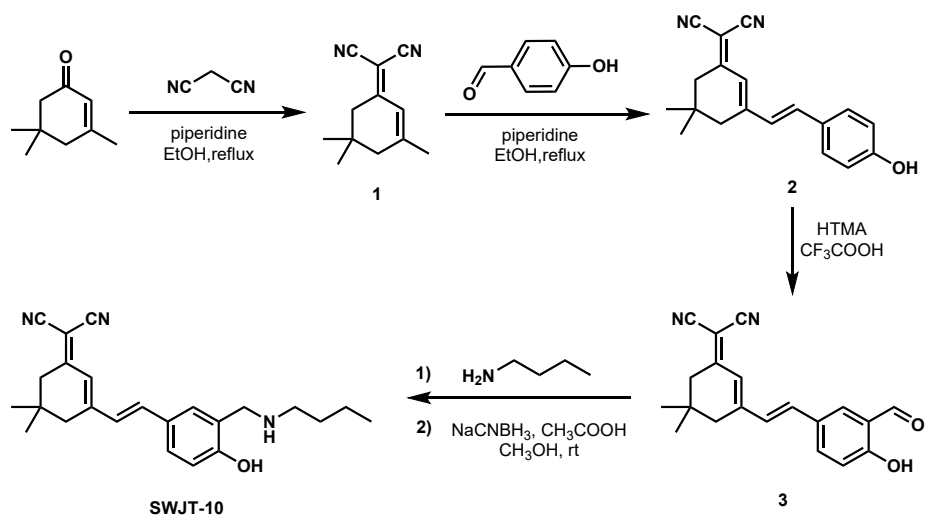

Scheme S1. Synthesis of probe SWJT-10.

4.  $^1\text{H}$ ,  $^{13}\text{C}$  NMR spectra and ESI-MS of SWJT-10.

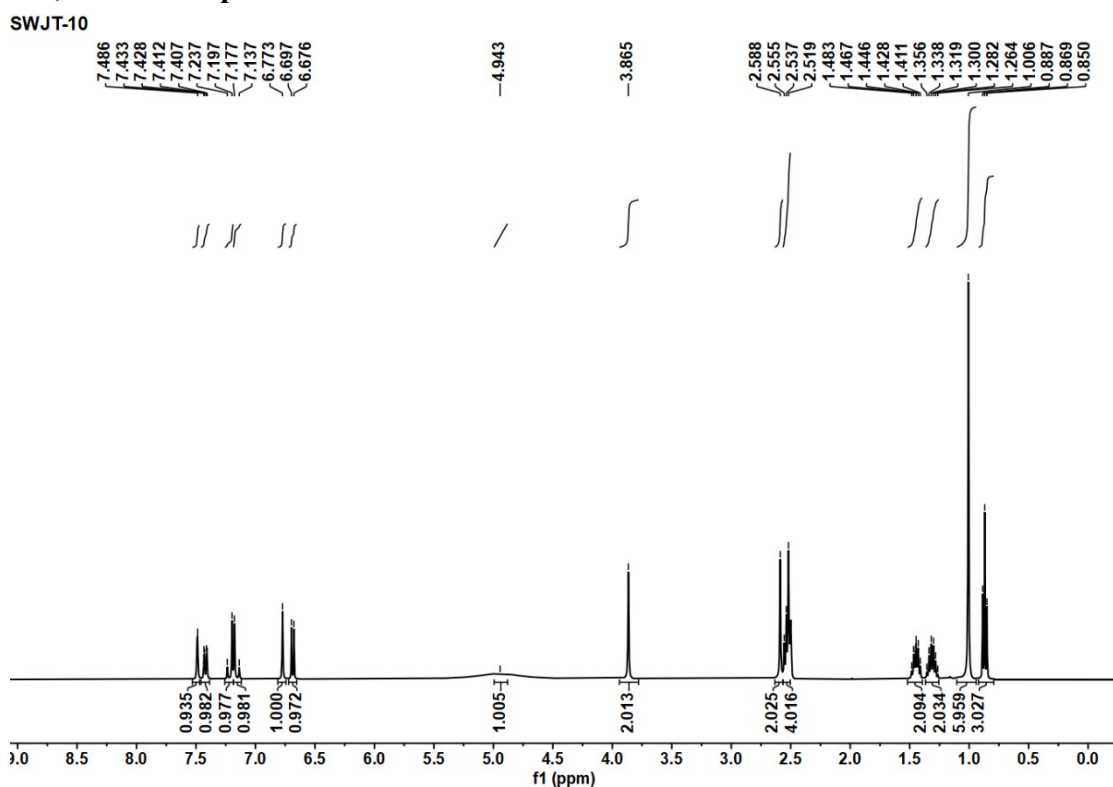

Fig. S1.  $^1\text{H}$  NMR spectrum of SWJT-10 in  $\text{DMSO-}d_6$ (400MHz).

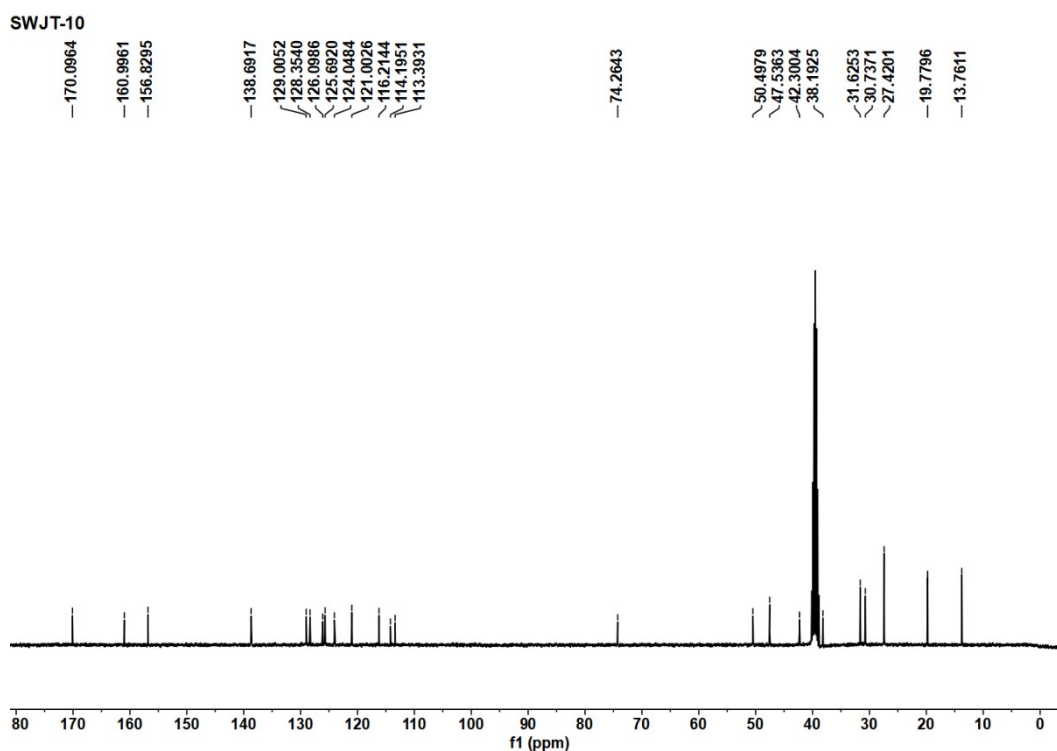

Fig. S2.  $^{13}\text{C}$  NMR spectrum of SWJT-10 in  $\text{DMSO-}d_6$ (100MHz).

### Generic Display Report

**Analysis Info**  
Analysis Name D:\Data\yangy\newWANGBAOJUN20220413\_16\_4\_01\_44928.d Acquisition Date 4/13/2022 12:18:51 PM  
Method POS\_100-1200\_For LC.m Operator LZU  
Sample Name WANGBAOJUN20220413\_16 Instrument micrOTOF  
Comment

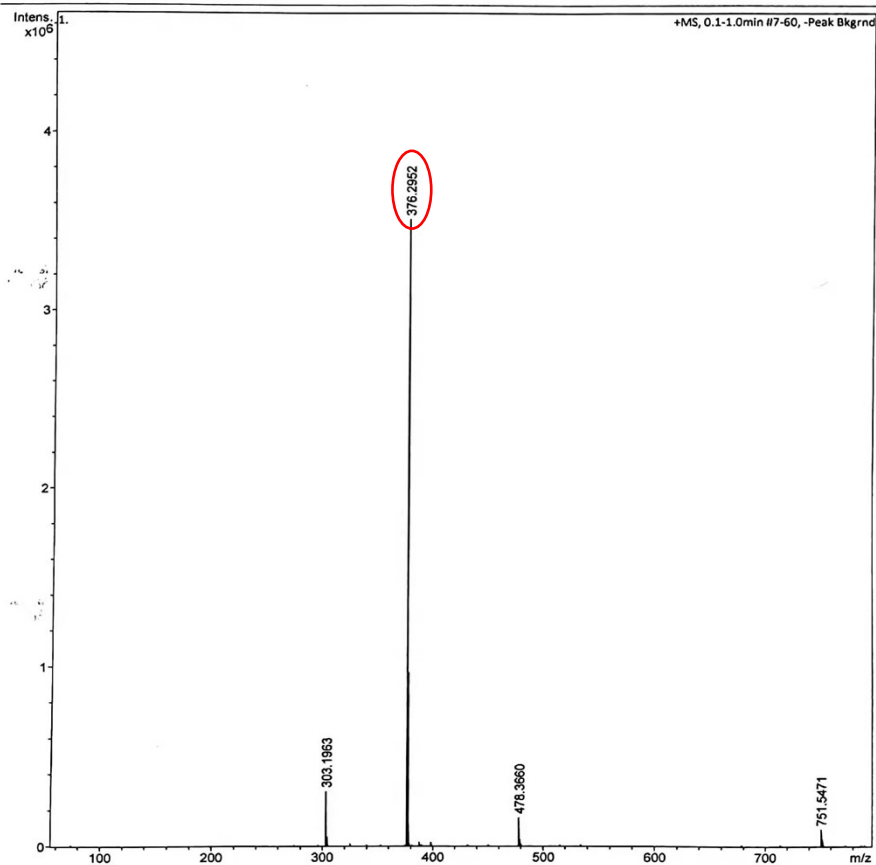

Bruker Compass DataAnalysis 4.1 printed: 4/13/2022 3:48:58 PM by: LZU Page 1 of 1

**Fig. S3.** ESI-MS spectrum of SWJT-10.

5. Screening conditions for the detection of FA by SWJT-10.

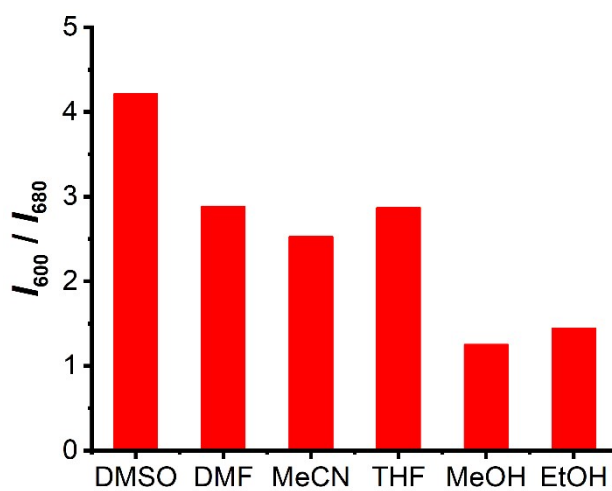

**Fig. S4.** The increase of the fluorescence ratio ( $I_{600}/I_{680}$ ) of **SWJT-10** in different organic solvents, after adding 1.0 mM FA ( $\lambda_{ex} = 435$  nm).



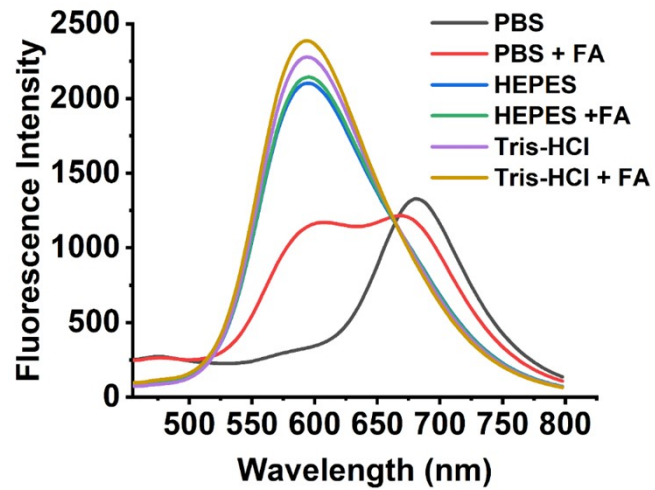

**Fig. S5.** Fluorescence spectral changes in different buffer solution (PBS, HEPES, Tris-HCl) ( $\lambda_{\text{ex}} = 435 \text{ nm}$ ).

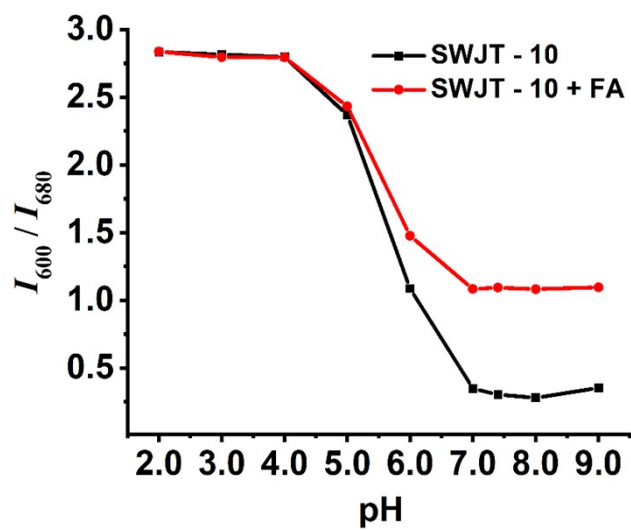

**Fig. S6.** pH effect of SWJT-10 (10.0  $\mu$ M) to FA (1.0 mM) ( $\lambda_{\text{ex}} = 435$  nm).

6. The stability of SWJT-10 and SWJT-10 +FA

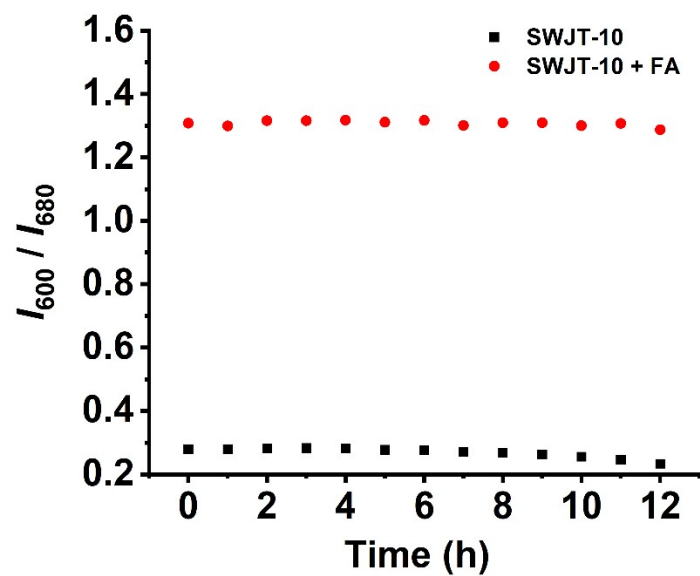

Fig. S7. The stability of SWJT-10 and SWJT-10 +FA ( $\lambda_{\text{ex}} = 435 \text{ nm}$ ).

## 7. The detection limit of SWJT-10 to FA.

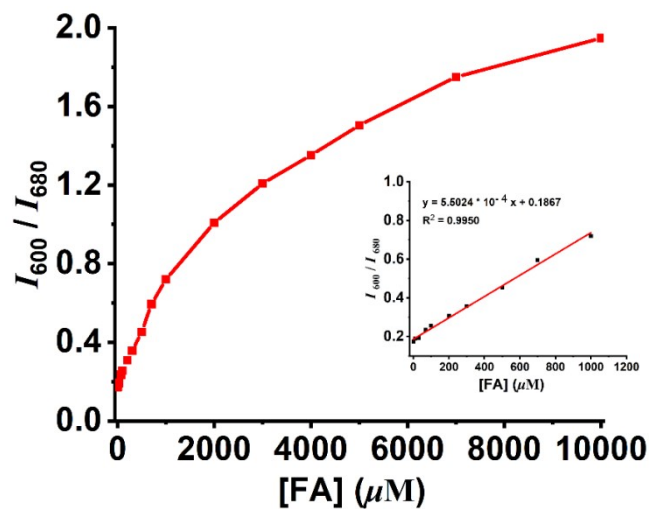

**Fig. S8.** Variation of  $I_{600}/I_{680}$  with increasing concentration (0.0 – 10.0 mM) of FA in PBS/DMSO (1: 1, v/v, pH=7.4) buffer solution ( $\lambda_{\text{ex}} = 435 \text{ nm}$ ). Linear relationship between  $I_{600}/I_{680}$  and FA concentration (inset).

The detection limit is calculated according to the formula:

$$\text{LOD} = K \times \delta/S$$

$$\text{Linear Equation: } Y = 5.5024 \times 10^{-4} \times X + 0.1867$$

$$S = 5.5024 \times 10^{-4}$$

$$\delta = 8.2476 \times 10^{-4}$$

$$K = 3$$

$$\text{LOD} = K \times \delta/S = 4.4967 \mu\text{M}$$

## 8. Selectivity and anti-interference studies.

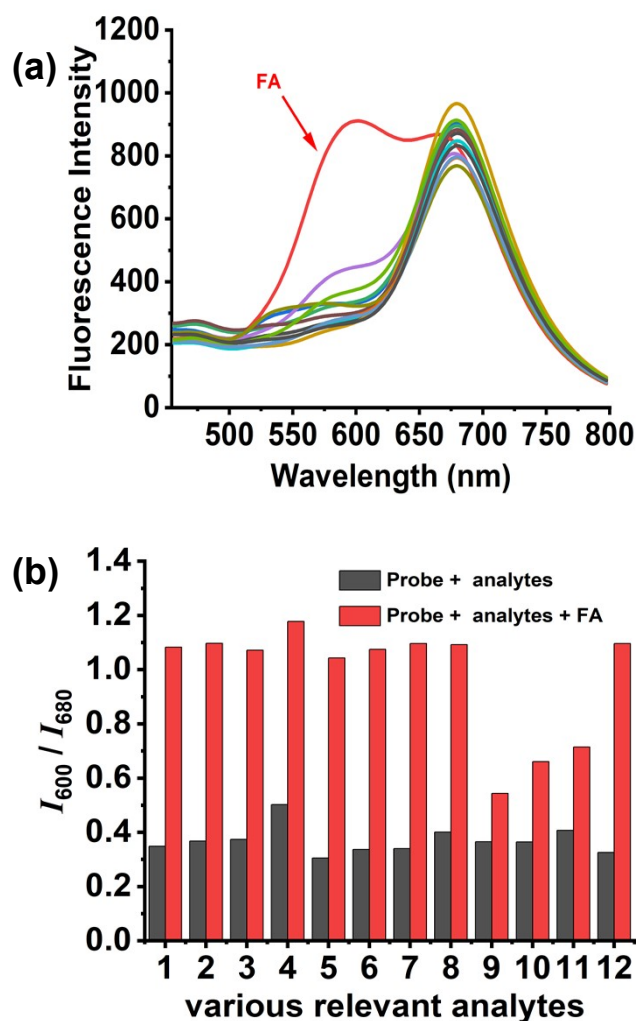

**Fig. S9.** (a) Fluorescence response of **SWJT-10** to FA and other analytes in PBS/DMSO (1: 1, v/v, pH=7.4) buffer solution ( $\lambda_{ex} = 435$  nm). (b) Fluorescence response of **SWJT-10** (10.0  $\mu$ M) to FA (1.0 mM) in the presence of various analytes (1.0 mM). (1) blank; (2) acetaldehyde; (3) glyoxal; (4) methylglyoxal; (5) acrolein; (6) pyruvate; (7)  $H_2O_2$ ; (8) HClO; (9) Cys; (10) Hcy; (11) GSH; (12) Glucose

9.  $^1\text{H}$  NMR titration spectrum of SWJT-10 with FA.

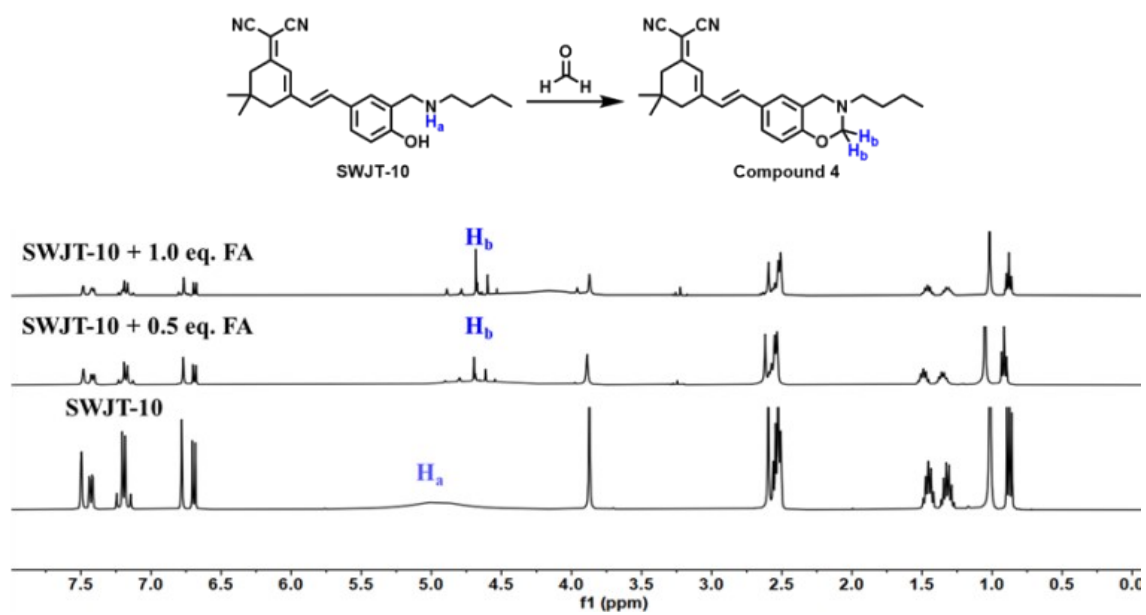

Fig. S10.  $^1\text{H}$  NMR spectra of SWJT-10 and SWJT-10 + FA in  $\text{DMSO-}d_6$  (400 MHz).

## 10. ESI-MS spectra of Compound 4.

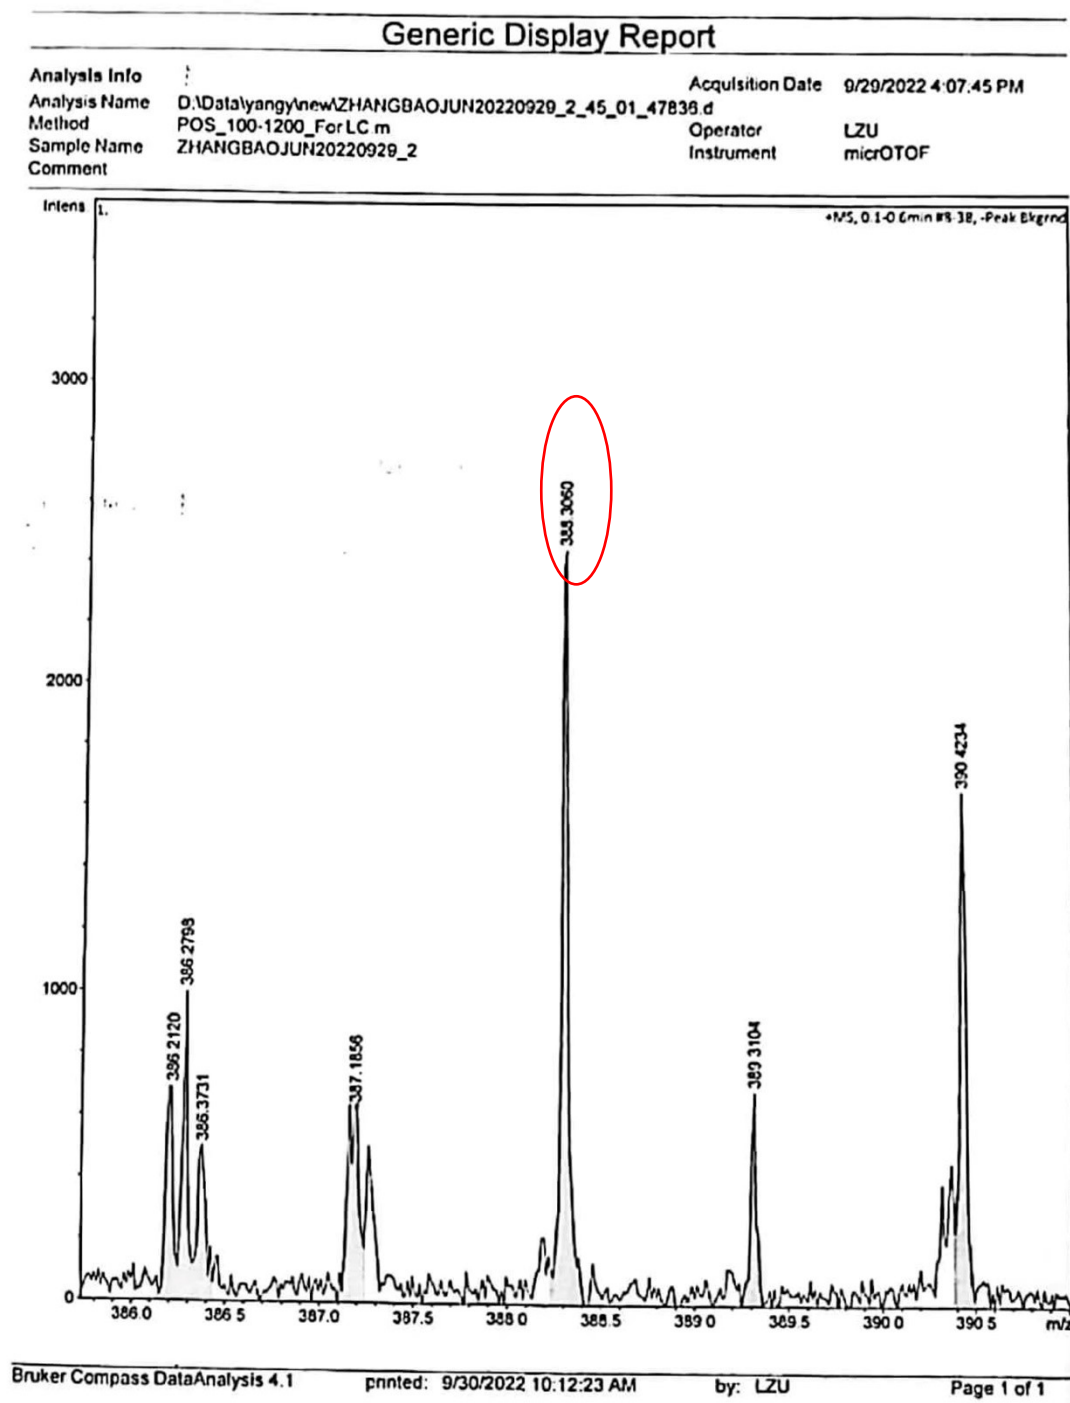

Fig. S11. ESI-MS spectrum of SWJT-10 + FA.

11. Cell viability of SWJT-10.

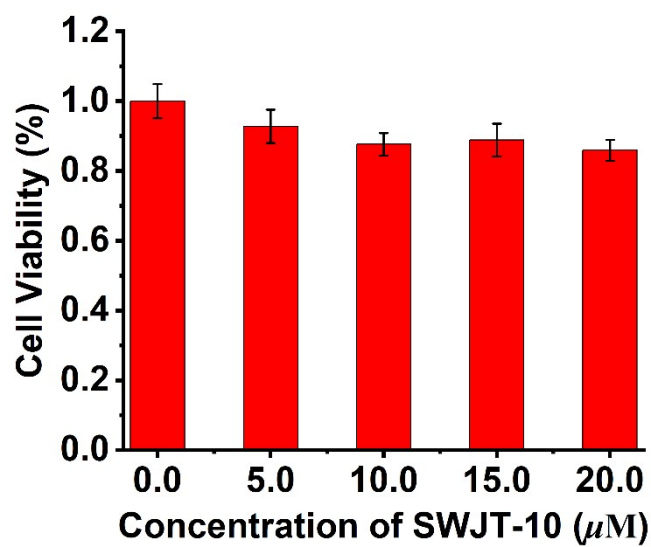

**Fig. S12.** Cytotoxicity of SWJT-10 at different concentrations (0.0, 5.0, 10.0, 15.0, 20.0  $\mu\text{M}$ ).
